# Supplementary material for: A novel multifunctional C3-symmetric triphenylamine discotic liquid crystal: synthesis, columnar self-assembly, organogel behavior, selective detection of PA and application in Si solar cells
Source: Royal Society of Chemistry journal article supplement (doi:10.1039/d4tc00001c), 2024-01-01
Supplement: d4tc00001c1.pdf [file d4tc00001c1.pdf]

## Supporting Information

### **A novel multifunctional $C_3$ -symmetric triphenylamine discotic liquid crystal: synthesis, columnar self-assembly, organogel behavior, selectively detecting PA and application in Si solar cells**

Lu Liu,<sup>‡a</sup> Jiayang Li,<sup>‡b</sup> He Zhu,<sup>a</sup> Hanyan Yang,<sup>a</sup> Xi Feng,<sup>a</sup> Daping Xiao,<sup>a</sup> Yu Yang,<sup>\*b</sup> Hongfei Gao<sup>\*a</sup>

<sup>a</sup> Key Laboratory of Medicinal Chemistry for Natural Resource, Ministry of Education; Yunnan Provincial Center for Research & Development of Natural Products; School of Pharmacy, Yunnan University, Kunming 650500, P. R. China. E-mail: [ghfynu@126.com](mailto:ghfynu@126.com);

<sup>b</sup> National Center for International Research on Photoelectric and Energy, Materials School of Materials and Energy, Yunnan University, Kunming 650500, P. R. China. E-mail: [yuyang@ynu.edu.cn](mailto:yuyang@ynu.edu.cn)

<sup>‡</sup> Both authors contributed equally to this work.

## Content

|                                                                      |     |
|----------------------------------------------------------------------|-----|
| 1. Material and methods.....                                         | S2  |
| 2. Synthesis and analytical data.....                                | S2  |
| 3. Additional POM texture.....                                       | S10 |
| 4. Additional X-ray data.....                                        | S10 |
| 5. Additional molecular arrangement, CV, UV and PL spectra data..... | S11 |
| 6. References.....                                                   | S16 |



## 1. Material and methods

Reactions requiring an inert gas atmosphere were conducted under argon and the glassware was oven-dried (100 °C). Commercially available chemicals were used as received.  $^1\text{H}$  NMR and  $^{13}\text{C}$  NMR spectra were recorded on Bruker-DRX-400 spectrometers with tetramethylsilane (TMS) as internal standard and  $\text{CDCl}_3$  as solvent. Elemental analysis was performed using an ThermoFisher FlashsmartCHNS/OMVC elemental analyzer. Column chromatography was performed with merck silica gel 60 (230-400 mesh). High-resolution MS spectra were measured on a RapifleX MALDI-TOF/TOF MS. UV/vis spectra were recorded on a UNICO UV-4802S spectrometer. Fluorescence spectral data was recorded on a Hitachi F-4500 fluorescence spectrometer. FT-IR spectra were recorded on Nicoletis10 spectrometer. Cyclic voltammograms (CV) were recorded on a CHI 660E S4 Electrochemical Workstation from Shanghai Chenhua Instrument (Shanghai, China) and conducted using a three electrodes system, with the modified GCE as working electrode, a platinum wire as the counter electrode, a saturated calomel electrode (SCE) as the reference electrode with nitrogen-saturated solution of 0.1 mol/L tetra-n-butylammonium tetrafluoroborate ( $\text{Bu}_4\text{NPF}_6$ ) in acetonitrile. XRD patterns were obtained using a RIGAKUTTRIII-18KW diffractometer using Ni-filtered  $\text{Cu K}\alpha$  radiation.

### The fabrication of Planar Organic-Si Hybrid Solar Cell

At first, pure liquid crystal sample **TPAP12** was dissolved in anhydrous tetrahydrofuran to prepare a solution at a concentration of 100 mg/mL. Second, the precursor solution was formed by mixing 5 wt% dimethyl sulfoxide (DMSO, 99.9%) and 0.2 wt% Triton X-100 in PEDOT:PSS (PH1000, Clevios). The prepared **TPAP12** solution was dissolved in a precursor solution with doping ratios of 0, 0.2, 0.4, 0.6, and 0.8 vol%, respectively.

The  $\langle 100 \rangle$  crystalline single-crystal Si substrate (n-type,  $0.05\text{--}0.1\ \Omega\ \text{cm}$ ,  $300 \pm 10\ \mu\text{m}$ ) was washed by sonication in acetone, deionized water, and isopropanol, and eventually immersed in 5% hydrofluoric acid (HF) for 1 min to remove natural oxides, then it was rinsed in the Millipore water. The prepared PEDOT:PSS+**TPAP12** solution was then covered on the H-terminated Si substrates with a speed of 3000 rpm for 60 s in a spinning manner. After the PEDOT:PSS+**TPAP12** was spin-coated, the sample was tempered on a heated plate at 130 °C for 20 min to form a uniform and conductive organic thin film of p-type in the Si substrate. Finally, 200 nm thick Ag grid was thermally vaporized on the device to the front electrode and an Al layer with a thickness of 60 nm was vaporized on the device to form the back electrode.

The  $J\text{--}V$  characteristics were measured by a solar IV measurement system (ZoliX SS150) at AM 1.5 G illumination. Optical transmission measurements of the film were measured by a spectrophotometer (Hitachi U-4100).

## 2. Synthesis and analytical data



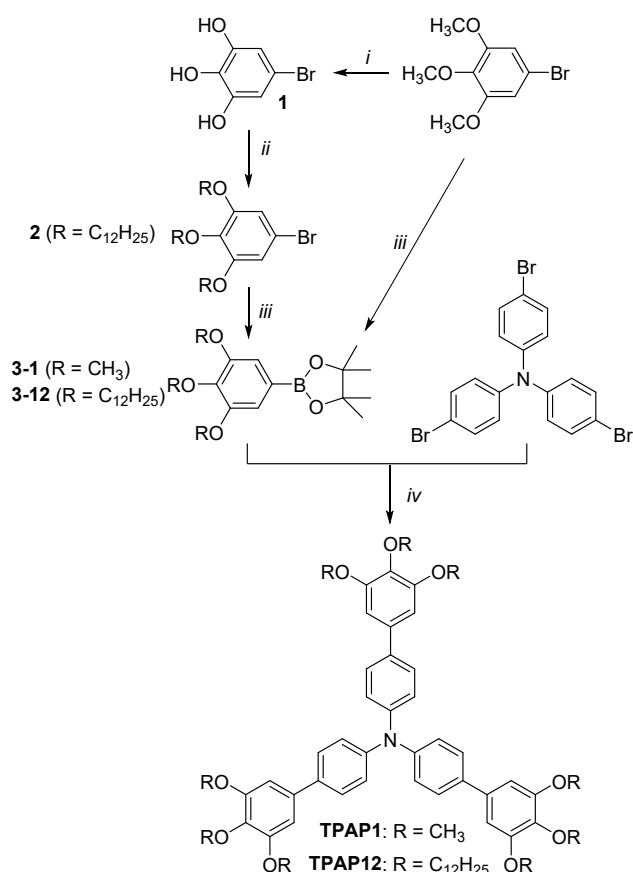

**Scheme S1** Synthesis of compounds **TPAP1** and **TPAP12**. *Reagents and conditions:* i) DCM, BBr<sub>3</sub>, 0 °C, 0.5 h, RT, 12 h; ii) C<sub>12</sub>H<sub>25</sub>Br, DMF, K<sub>2</sub>CO<sub>3</sub>, 90 °C, 12 h; iii) AcOK, PdCl<sub>2</sub>(dppf), 1,4-Dioxane, 100 °C, 18 h; iv) THF, K<sub>2</sub>CO<sub>3</sub>, 70 °C, Pd(PPh<sub>3</sub>)<sub>4</sub>, 24 h.

## 1.1 General

Reactions requiring an inert gas atmosphere were conducted under argon and the glassware was oven-dried (120 °C). Commercially available chemicals were used as received. <sup>1</sup>H NMR and <sup>13</sup>C NMR spectra were recorded on Bruker-DRX-400 spectrometers. Elemental analysis was performed using an Elementar VARIO EL elemental analyzer. Column chromatography was performed with merck silica gel 60 (230-400 mesh). The analytical data correspond to those reported in the references.

## 1.2 Compound 1

To a 100 mL flask were added 1-bromo-3,4,5-trimethoxybenzene (1.52 g, 6.15 mmol) and 50 mL dry CH<sub>2</sub>Cl<sub>2</sub>. Then BBr<sub>3</sub> (1 M, 2.1 mL) was added carefully at 0 °C and the solution was stirred at room temperature for 12 h. After the reaction was complete (TLC), 5 mL of water was added carefully into the reaction mixture. The mixture was filtered and washed exhaustively with petroleum ether, and the obtained solid was extracted with absolute ethanol, and the organic layer was spin-dried to obtain the desired product **1** as brown solid. The obtained product was used directly for the next step.

## 1.3 Compound 2

To a 50 mL necked round bottom flask were added 1-Bromo-3,4,5-trihydroxybenzene (compound **1**) (500 mg, 2.44 mmol) and 3 mL of DMF. and K<sub>2</sub>CO<sub>3</sub> (1.52 g, 10.98 mmol). The mixture was heated to 90 °C and stirred for 30 min. Add C<sub>12</sub>H<sub>25</sub>Br (10.98 mmol) in the reaction system and continue to react



for 24 h to obtain the desired product **2** as white solid. Yield: 81% (1.40 g, 1.97 mmol). <sup>1</sup>H NMR (CDCl<sub>3</sub>; 400 MHz):  $\delta$  = 6.67 (s, 2 H, 2 ArH), 3.94-3.88 (m, 6 H, 3 OCH<sub>2</sub>), 1.82-1.69 (m, 6 H, 3 OCH<sub>2</sub>CH<sub>2</sub>), 1.47-1.41 (m, 6 H, 3 OCH<sub>2</sub>CH<sub>2</sub>CH<sub>2</sub>), 1.33-1.21 (m, 48 H, 24 CH<sub>2</sub>), 0.88 (t,  $J$  = 6.6 Hz, 9 H, 3 CH<sub>3</sub>).

#### 1.4 Compound 3-12

To a mixture of **2** (986  $\mu$ mol), 4 Bis (pinacolato) diboron (625.93 mg, 2.46 mmol), AcOK (483.8 mg, 4.93 mmol), 10 ml dry 1,4-Dioxane and PdCl<sub>2</sub>(dppf) (0.1 mmol) to a 50ml necked round bottom flask under argon. The reaction mixture was heated to reflux and this temperature was maintained for 18 h under intensive stirring. After being cooled to room temperature and 20 mL water was added, then the mixture was extracted with ethyl acetate (3  $\times$  30 mL). The combined extracts were dried over anhydrous Na<sub>2</sub>SO<sub>4</sub>, and the solvent was removed in *vacuo*. The residue was purified by chromatography (eluent: petroleum ether/ethyl acetate = 20/1, V/V). White solid, yield: 94% (701.6 mg, 0.927 mmol). <sup>1</sup>H NMR (CDCl<sub>3</sub>; 400 MHz):  $\delta$  = 6.99 (s, 2 H, 2 ArH), 4.02-3.95 (m, 6 H, 3 OCH<sub>2</sub>), 1.83-1.70 (m, 6 H, 3 OCH<sub>2</sub>CH<sub>2</sub>), 1.46-1.43 (m, 6 H, 3 OCH<sub>2</sub>CH<sub>2</sub>CH<sub>2</sub>), 1.33 (s, 12 H, 4 CH<sub>3</sub>), 1.32-1.18 (m, 48 H, 24 CH<sub>2</sub>), 0.88 (t,  $J$  = 6.6 Hz, 9 H, 3 CH<sub>2</sub>CH<sub>3</sub>).

#### 1.5 Compound 3-1

Under argon gas, add a mixture of 1-bromo-3,4,5-trimethoxybenzene (1.00 g, 4.05 mmol), 4-bis (pinacolato) diborane (2.57 g, 10.12 mmol), AcOK (1.99 g, 20.24 mmol), 15 ml of dried 1,4-dioxane, and PdCl<sub>2</sub>(dppf) (0.1 mmol) to a 50 ml neck round bottom bottle. Heat the reaction mixture to reflux and maintain this temperature for 12 hours under intense stirring. After cooling to room temperature and adding 20 mL of water, use ethyl acetate (3  $\times$  30 mL) extraction mixture. Dry the combined extract with anhydrous Na<sub>2</sub>SO<sub>4</sub> and remove the solvent in vacuum. The residue was purified by chromatography (eluent: petroleum ether/ethyl acetate = 10/1, V/V). Yellow solid, yield: 92% (1.09 g, 3.73 mmol) <sup>1</sup>H NMR (CDCl<sub>3</sub>; 400 MHz):  $\delta$  = 7.03 (s, 2 H, 2 ArH), 3.90 (s, 6 H, 2 OCH<sub>3</sub>), 3.87 (s, 3 H, 1 OCH<sub>3</sub>), 1.34 (s, 12 H, 4 CH<sub>3</sub>).

#### 1.6 Compound TPAP1

To a mixture of **3-1** (1.00 g, 3.41 mmol), tris (4-bromophenyl) amine (470 mg, 0.98 mmol), and an aqueous solution of 2 M K<sub>2</sub>CO<sub>3</sub> (2 mL) in dry THF (5 mL), Pd(PPh<sub>3</sub>)<sub>4</sub> (115.6 mg, 0.1 mmol) (purged with N<sub>2</sub>). Heat the reaction mixture to reflux and maintain this temperature for 14 hours under intense stirring. After cooling to room temperature and adding 20 mL of water. Using DCM (3  $\times$  50 mL) extract the mixture. Dry the merged organic layer with anhydrous Na<sub>2</sub>SO<sub>4</sub>. After vacuum evaporation of the solvent, the residue was purified by DCM pure **TPAP1** (580 mg, 80%) as a yellow solid. <sup>1</sup>H NMR (CDCl<sub>3</sub>; 400 MHz):  $\delta$  = 7.48 (d,  $J$  = 8.4 Hz, 6 H, 6 ArH), 7.23 (d,  $J$  = 8.8 Hz, 6 H, 6 N-ArH), 6.77 (s, 6 H, 6 ArH), 3.93 (s, 18 H, 6 OCH<sub>3</sub>), 3.89 (s, 9 H, 3 OCH<sub>3</sub>); <sup>13</sup>C NMR (CDCl<sub>3</sub>; 100 MHz): 153.6 (6 C), 146.9 (3 C), 137.6 (3 C), 136.8 (3 C), 136.1 (3 C), 128.1 (6 C), 124.5 (6 C), 104.2 (6 C), 61.1 (3 C), 56.3 (6 C) 14.1(multicarbons in alkyl chains). The single crystal data was submitted to the Cambridge Crystallographic Data Centre (CCDC), and its corresponding number is 2312835.

#### 1.7 The target compound TPAP12



To a mixture of **3-12** (1.0 g, 3.4 mmol), tris(4-bromophenyl)amine (50 mg, 103.7  $\mu\text{mol}$ ), and an aqueous solution of 2 M  $\text{K}_2\text{CO}_3$  (2 mL) in dry THF (5 mL),  $\text{Pd}(\text{PPh}_3)_4$  (115.6 mg, 0.1 mmol) (purged with  $\text{N}_2$ ) was added. The reaction mixture was heated to reflux and this temperature was maintained for 24 h under intensive stirring. After being cooled to room temperature and 20 mL water was added. The mixture was extracted with ethyl acetate ( $3 \times 50$  mL). The combined organic layer was dried over anhydrous  $\text{Na}_2\text{SO}_4$ . After evaporation of the solvent in *vacuo*, the residue was purified by chromatography (eluent: petroleum ether/ethyl acetate = 20/1, V/V) to yield pure **TPAPI2** as a white solid (181.4 mg, 82%).  $^1\text{H}$  NMR ( $\text{CDCl}_3$ ; 400 MHz):  $\delta$  = 7.45 (d,  $J$  = 8.8 Hz, 6 H, 6 ArH), 7.19 (d,  $J$  = 8.8 Hz, 6 H, 6 ArH), 6.74 (s, 6 H, 6 ArH), 4.05-3.97 (m, 18 H, 9  $\text{ArOCH}_2$ ), 1.86-1.73 (m, 18 H, 9  $\text{ArOCH}_2\text{CH}_2$ ) 1.53-1.42 (m, 18 H, 9  $\text{ArOCH}_2\text{CH}_2\text{CH}_2$ ) 1.34-1.23 (m, 144 H, 72  $\text{CH}_2$ ) 0.87 (t,  $J$  = 6.8 Hz, 27 H, 9  $\text{CH}_3$ );  $^{13}\text{C}$  NMR ( $\text{CDCl}_3$ ; 100 MHz): 153.5 (6 C), 146.8 (3 C), 137.9 (3 C), 136.12 (3 C), 136.08 (3 C), 127.9 (6 C), 124.4 (6 C), 105.8 (6 C), 73.7 (3 C), 69.4 (6 C), 32.1 (9 C), 30.5-29.5 (63 C), 26.3 (9 C), 22.8 (9 C), 14.3 (9 C) 14.1 (multicarbons in alkyl chains); MALDI-TOF:  $m/z$  calculated for  $\text{C}_{144}\text{H}_{243}\text{NO}_9$ ,  $[\text{M}]^+$ : 2131.8616, found 2131.8638; Elemental analysis calcd (%) for  $\text{C}_{144}\text{H}_{243}\text{NO}_9$  (2132.53): C 81.10, H 11.49; Found: C 80.92, H 11.54.

### 1.8 NMR spectra

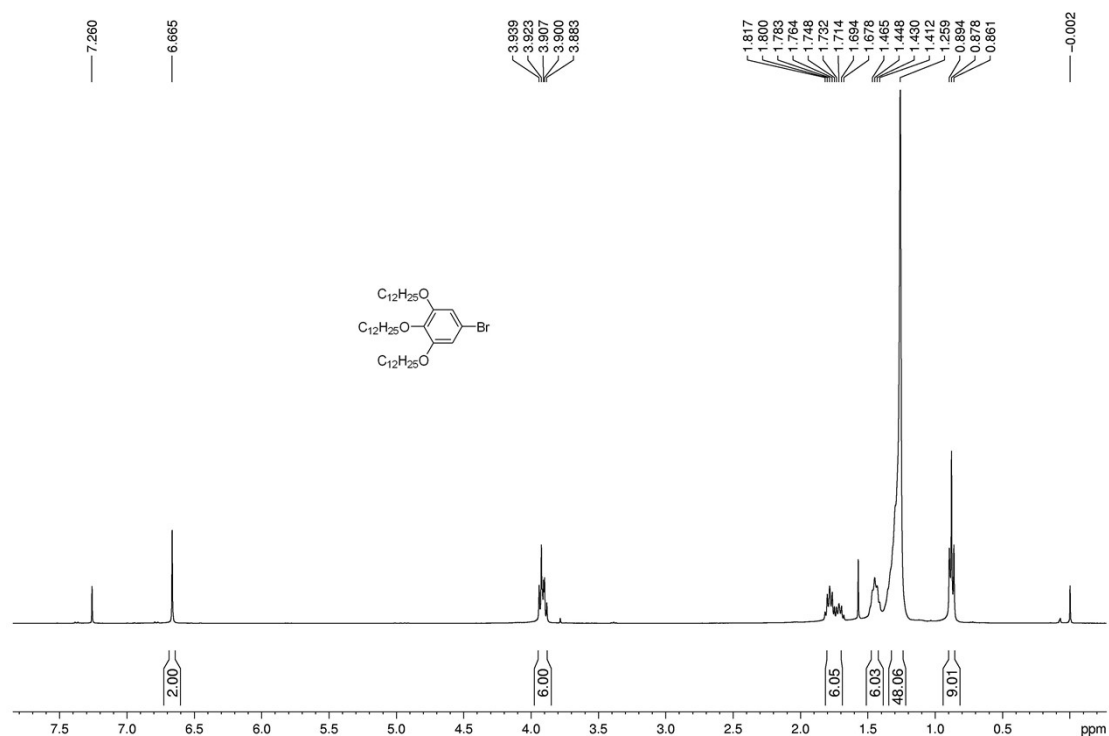

**Fig. S1**  $^1\text{H}$  NMR spectrum of compound **2** (400 MHz, in  $\text{CDCl}_3$ ).



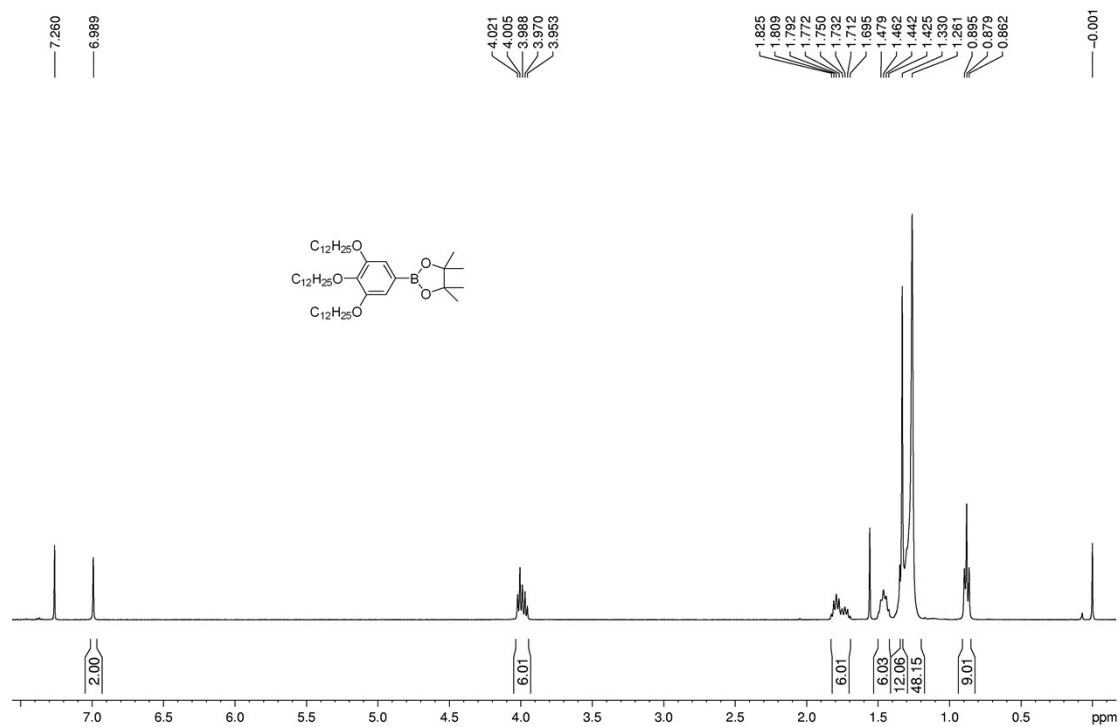

**Fig. S2**  $^1\text{H}$  NMR spectrum of compound **3-12** (400 MHz, in  $\text{CDCl}_3$ ).

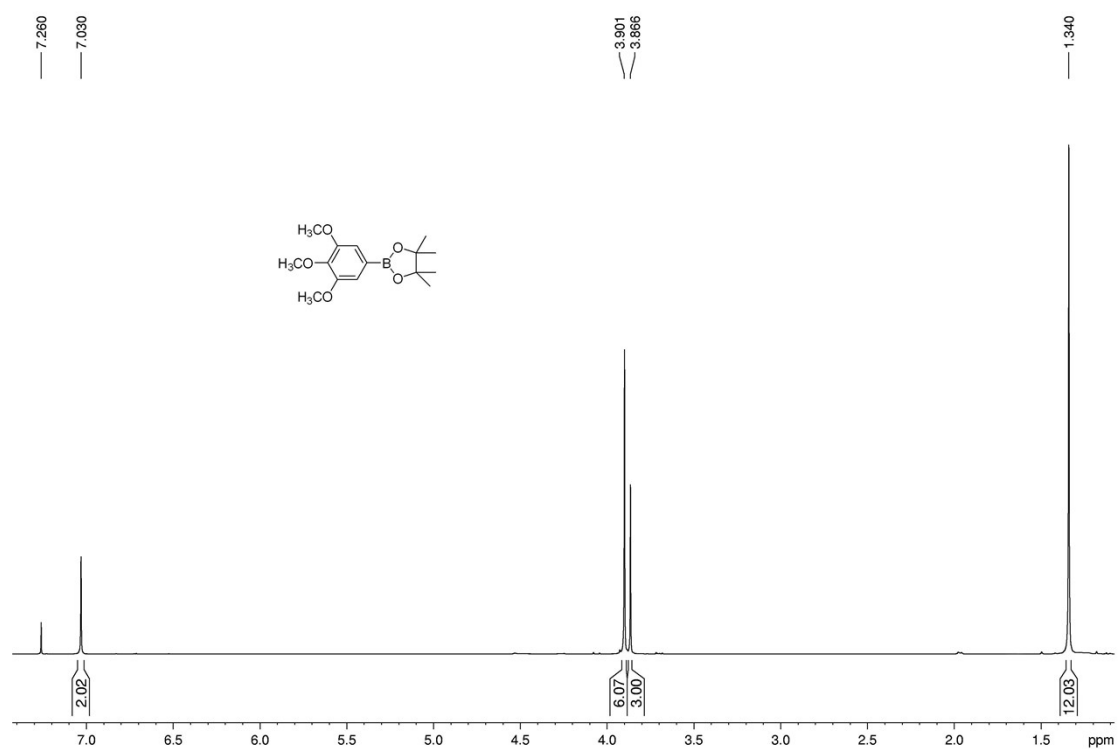

**Fig. S3**  $^1\text{H}$  NMR spectrum of compound **3-1** (400 MHz, in  $\text{CDCl}_3$ ).



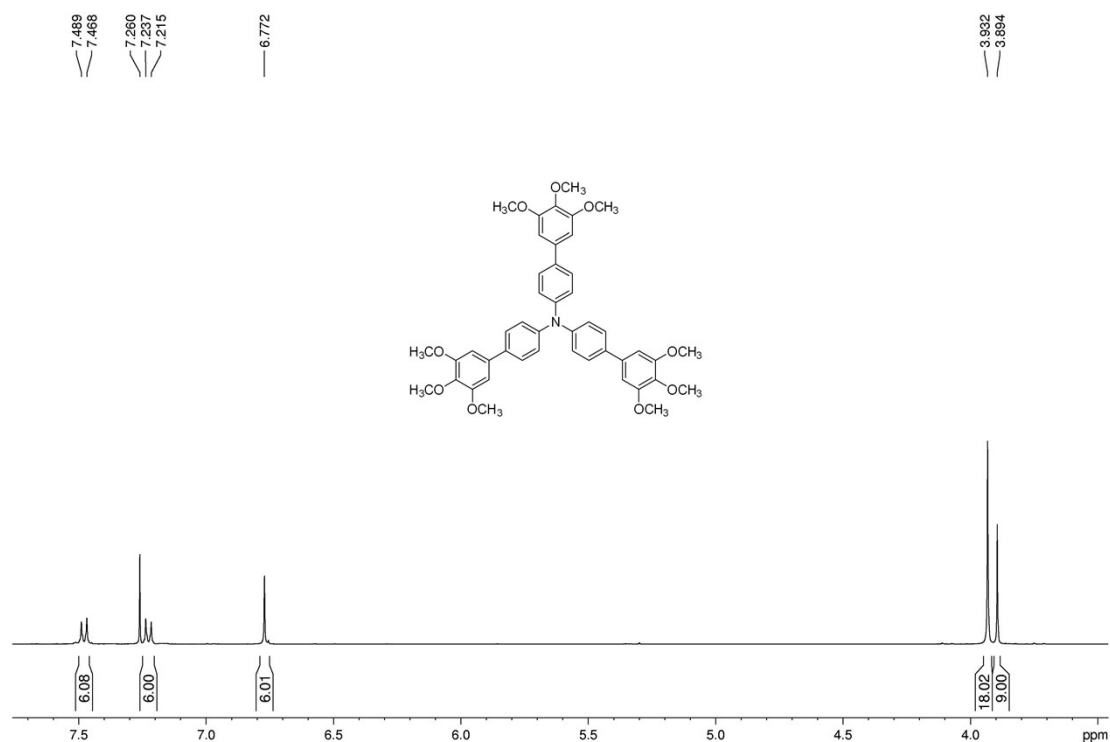

Fig. S4 <sup>1</sup>H NMR spectrum of compound TPAP1 (400 MHz, in CDCl<sub>3</sub>).

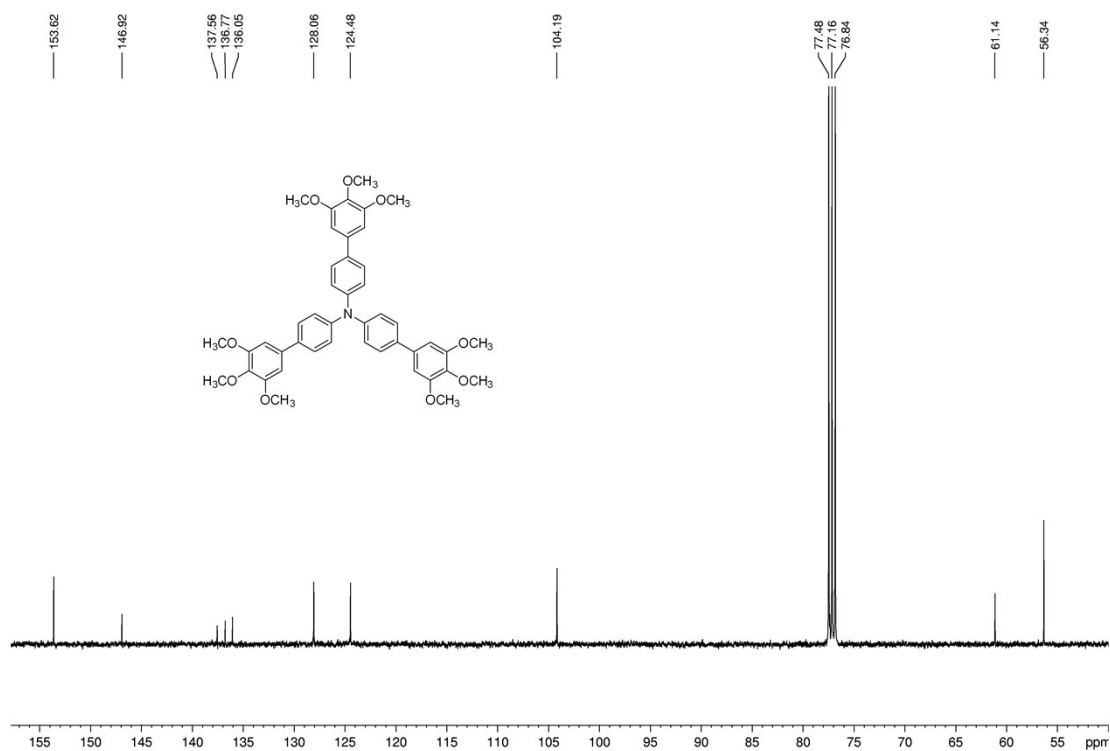

Fig. S5 <sup>13</sup>C NMR spectrum of compound TPAP1 (100 MHz, in CDCl<sub>3</sub>).



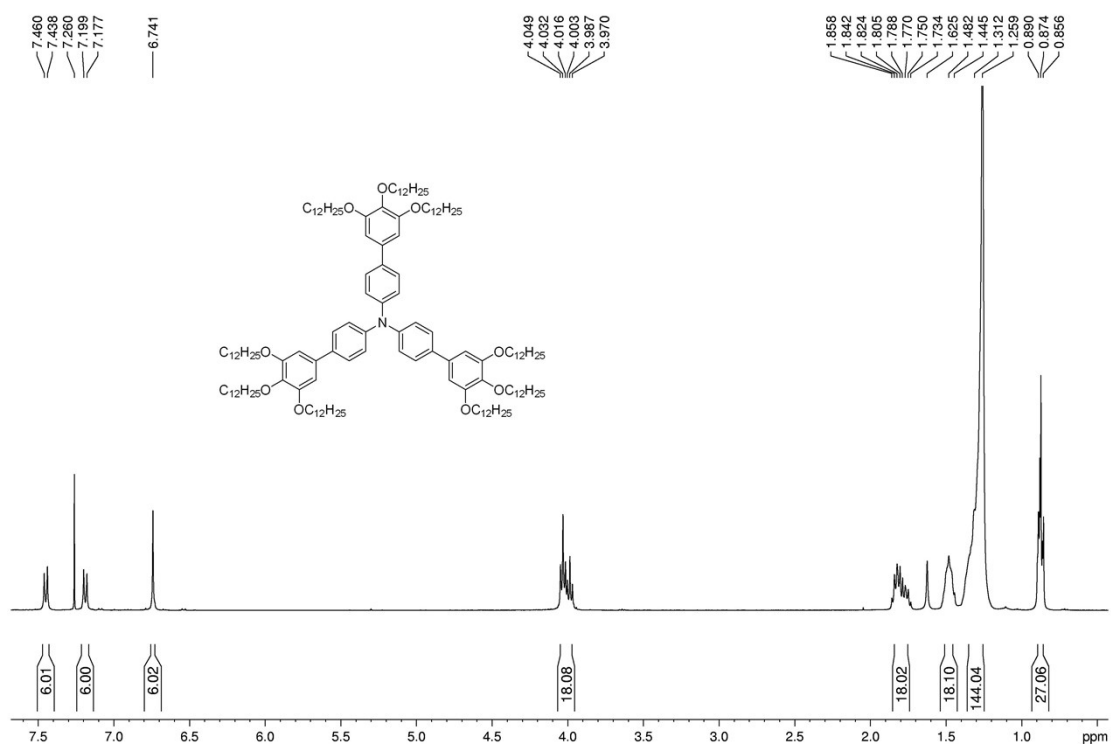

Fig. S6 <sup>1</sup>H NMR spectrum of compound TPAP12 (400 MHz, in CDCl<sub>3</sub>).

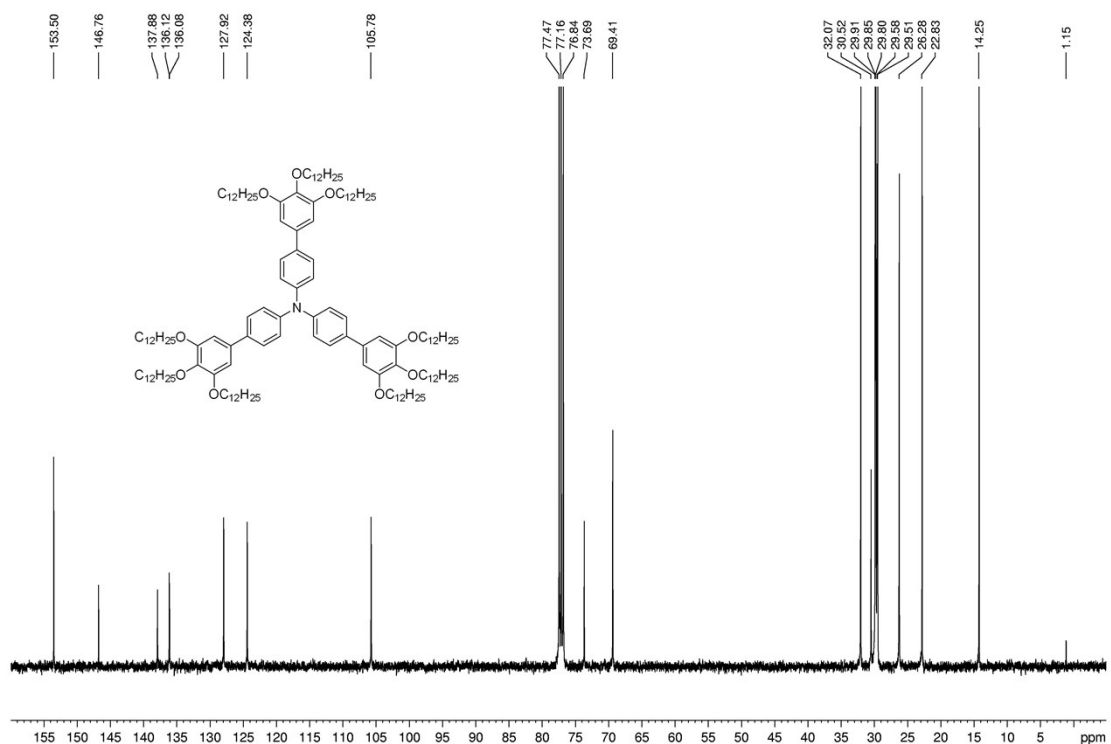

Fig. S7 <sup>13</sup>C NMR spectrum of compound TPAP12 (100 MHz, in CDCl<sub>3</sub>).



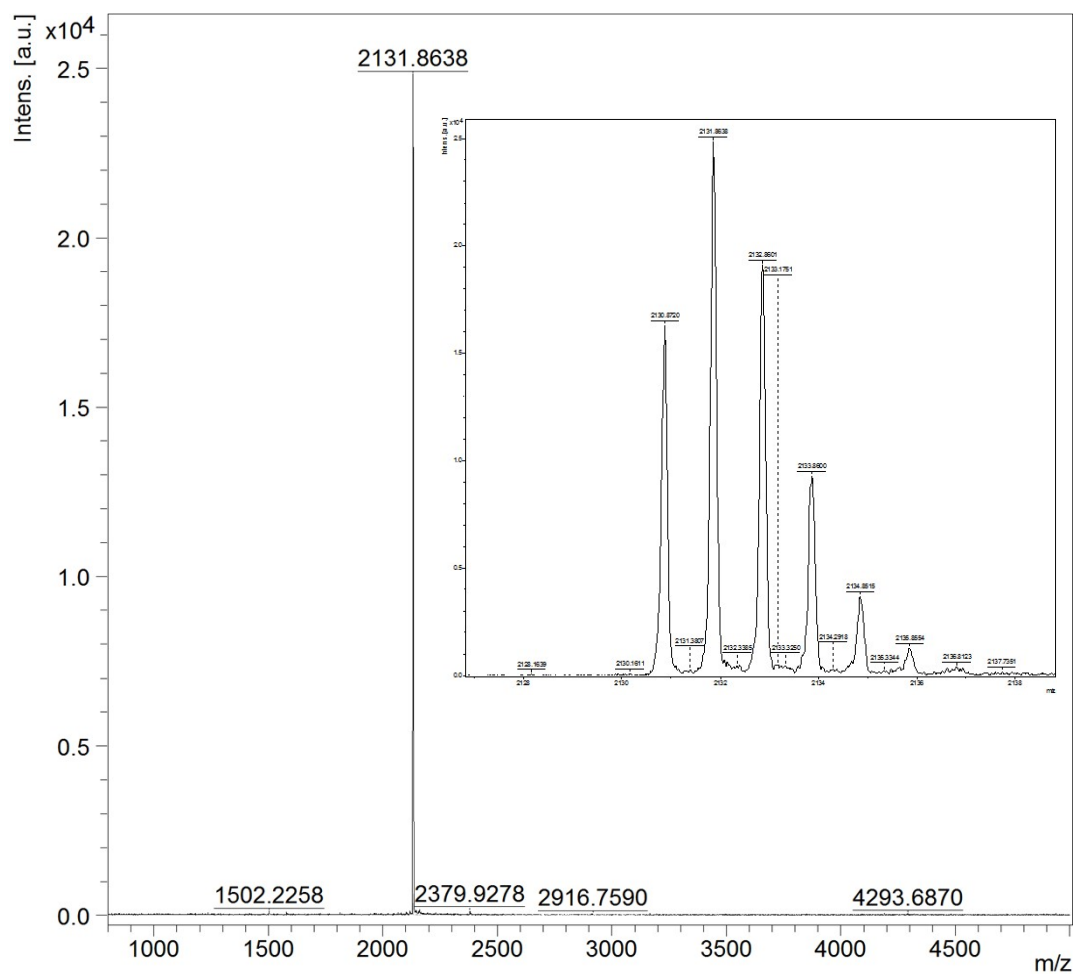

**Fig. S8** MALDI-TOF-MS spectra of compound **TPAP12**. (MALDI-TOF:  $m/z$  calculated for  $C_{144}H_{243}NO_9$ ,  $[M]^+$ : 2131.8616, found 2131.8638).

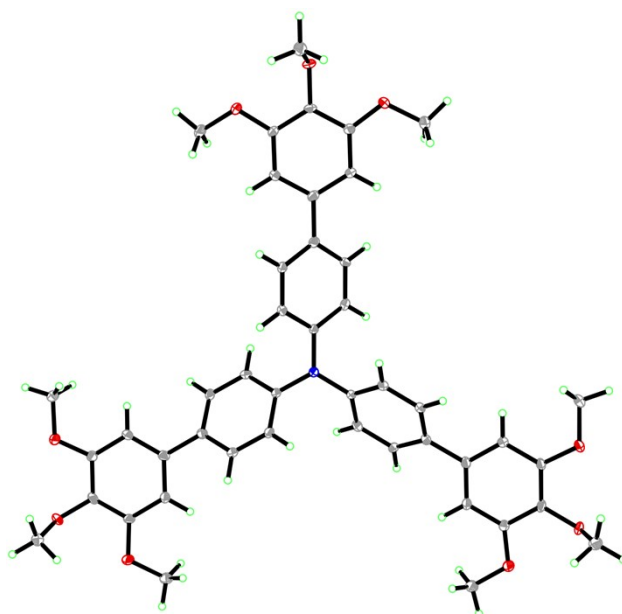

**Fig. S9** The single crystal X-ray structure of **TPAP1**.



### 3. Additional POM texture

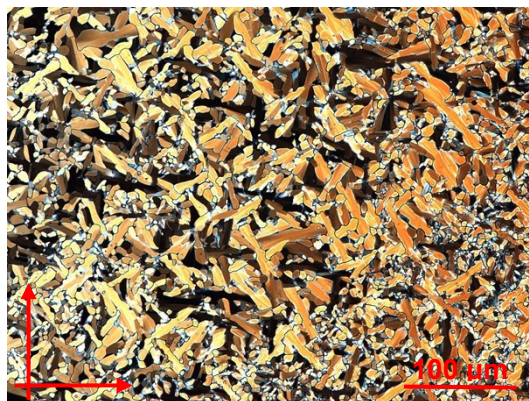

Fig. S10 The texture of the Col<sub>h</sub> phase of TPAP12 observed by POM at  $T = 55$  °C on heating process.

### 4. Additional X-ray data

#### 4.1 Experimental techniques

High-resolution small-angle powder diffraction experiments were recorded at the 1W2A SAXS beamline at Beijing Accelerator Laboratory [S1]. Samples were held in evacuated 1 mm capillaries. A modified Linkam hot stage with a thermal stability within 0.2 °C was used, with a hole for the capillary drilled through the silver heating block and mica windows attached to it on each side. A MarCCD 165 detector was used.  $q$  calibration and linearization were verified using several orders of layer reflections from silver behemate.

For 2D structures  $I(hk)$  and Eqn. (1) was used:

$$E(xy) = \sum_{hk} \text{sqrt}[I(hk)] \exp[i2\pi(hx+ky) + \phi_{hk}] \quad (\text{Eqn. 1})$$

here  $m$  being the multiplicity,  $F$  the structure factor, which is proportional to the intensity and  $\phi$  the phase of the reflex.

#### 4.2 Molecular dynamics simulation

Annealing dynamics runs were carried out using the Universal Force Field (Material Studio, Accelrys). The structures in Fig. 6 were obtained with 2 molecules in a 60 degree rhombic prism box with the side equal to the unit cell length and a height of 0.9 nm, with 3D periodic boundary conditions. 30 temperature cycles of NVT dynamics were run between 300 and 700 K, with a total annealing time of 30 ps.

#### 4.3 Additional X-ray data



**Table S1** Experimental and calculated  $d$ -spacing of the observed SAXS reflection of the hexagonal columnar phase in **TPAP12** at cooling 25 °C. All intensity values are Lorentz and multiplicity corrected.

| $(hk)$                              | $d_{\text{obs}}\text{-spacing}(\text{\AA})$ | $d_{\text{cal}}\text{-spacing}(\text{\AA})$ | intensity | phase |
|-------------------------------------|---------------------------------------------|---------------------------------------------|-----------|-------|
| (10)                                | 31.5                                        | 31.5                                        | 100       | 0     |
| (11)                                | 18.2                                        | 18.2                                        | 0.05      | 0     |
| (20)                                | 15.8                                        | 15.8                                        | 0.13      | $\pi$ |
| $a_{\text{hex}} = 36.4 \text{ \AA}$ |                                             |                                             |           |       |

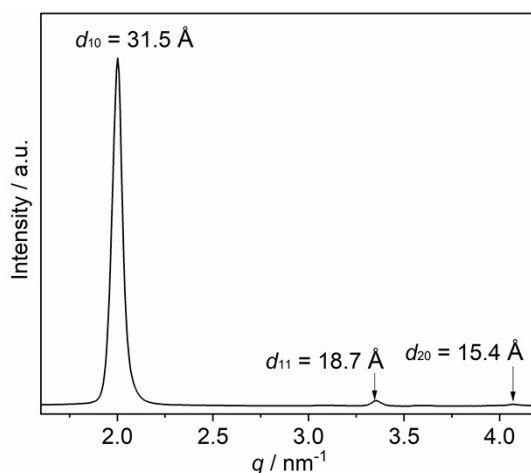

**Fig. S11** X-ray diffraction pattern of the Col<sub>h</sub> phase of compound **TPAP12** at  $T = 55 \text{ }^{\circ}\text{C}$  on heating process.

**Table S2** Experimental and calculated  $d$ -spacing of the observed SAXS reflection of the hexagonal columnar phase in **TPAP12** at  $T = 55 \text{ }^{\circ}\text{C}$  on heating process. All intensity values are Lorentz and multiplicity corrected.

| $(hk)$                              | $d_{\text{obs}}\text{-spacing}(\text{\AA})$ | $d_{\text{cal}}\text{-spacing}(\text{\AA})$ | intensity | phase |
|-------------------------------------|---------------------------------------------|---------------------------------------------|-----------|-------|
| (10)                                | 31.4                                        | 31.5                                        | 100       | 0     |
| (11)                                | 18.7                                        | 18.2                                        | 1.06      | 0     |
| (20)                                | 15.4                                        | 15.8                                        | 0.19      | $\pi$ |
| $a_{\text{hex}} = 36.4 \text{ \AA}$ |                                             |                                             |           |       |

#### 4. Additional molecular arrangement, CV, UV and PL spectra data

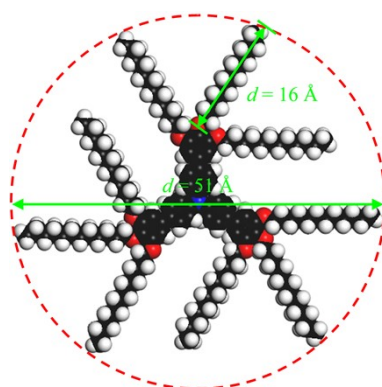

**Fig. S12** CPK model of **TPAP12** calculated using Materials Studio software.



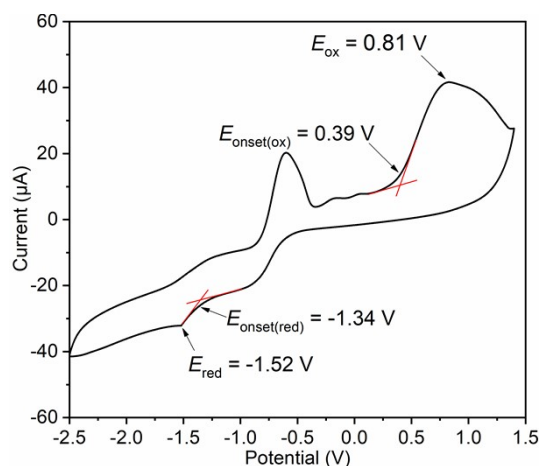

**Fig. S13** Cyclic voltammogram of **TPAP12** film on glassy carbon electrode in 0.1 mol/L Bu<sub>4</sub>NPF<sub>6</sub> in acetonitrile solution with a scan rate of 100 mVs<sup>-1</sup>. Reference electrode: Ag/AgCl.

**Table S3** Electrochemical properties of **TPAP12** in CH<sub>3</sub>CN solution.

| Comp.         | $E_{ox}$ (V) | $E_{red}$ (V) | $E_{HOMO}^a$ (V) | $E_{LUMO}^b$ (V) | $E_g^c$ (V) |
|---------------|--------------|---------------|------------------|------------------|-------------|
| <b>TPAP12</b> | 0.81         | -1.52         | -5.10            | -3.37            | 1.73        |

<sup>a</sup>  $E_{HOMO} = -E_{onset(ox)} - 4.71$  eV; <sup>b</sup>  $E_{LUMO} = -E_{onset(red)} - 4.71$  eV; <sup>c</sup>  $E_g = E_{LUMO} - E_{HOMO}$ .

**Table S4** Gelation properties of compound **TPAP12** in different solvents at room temperature.<sup>a</sup>

| Solvent       | <b>TPAP12</b> | Solvent           | <b>TPAP12</b> |
|---------------|---------------|-------------------|---------------|
| Chloroform    | S             | Cyclohexane       | S             |
| Ethyl acetate | S             | Hexane            | S             |
| THF           | S             | <i>n</i> -Butanol | G             |
| Methanol      | IS            | Toluene           | S             |
| Acetone       | P             | Dichloromethane   | S             |
| DMF           | IS            | Ethanol           | IS            |
| 1,4-Dioxane   | G             | DMSO              | IS            |
| PE            | S             | Acetonitrile      | IS            |

<sup>a</sup> S = solution, P = precipitation, G = gelation, PG = partial gelation, IS = insoluble; gelator concentration is 5.0 mg mL<sup>-1</sup>; gels formed at room temperature.

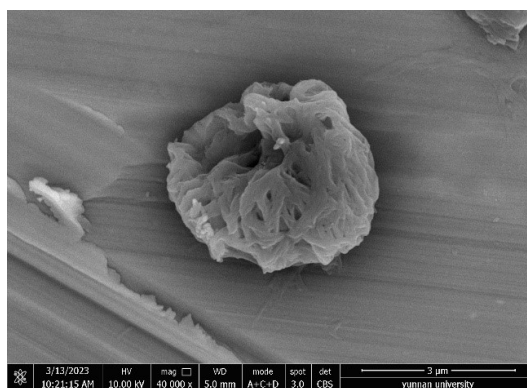

**Fig. S14** SEM image of xerogel formed by **TPAP12** in *n*-butanol (scale bar is 3 μm).



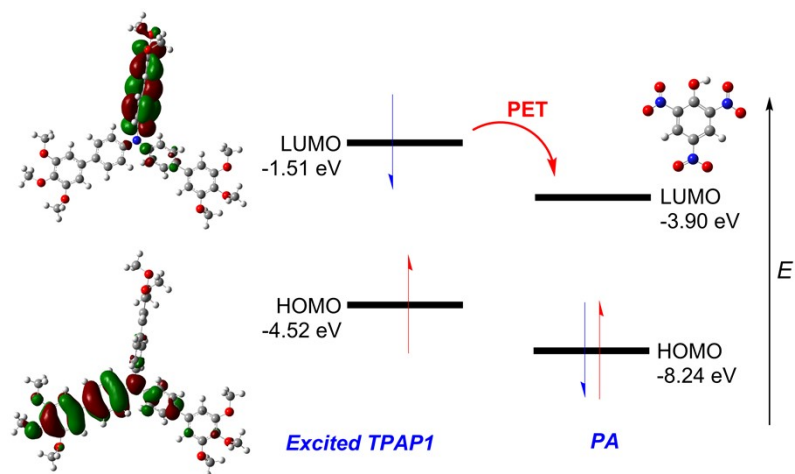

**Fig. S15.** Schematic illustration for photo-induced electron transfer process between TPAP1 and PA.

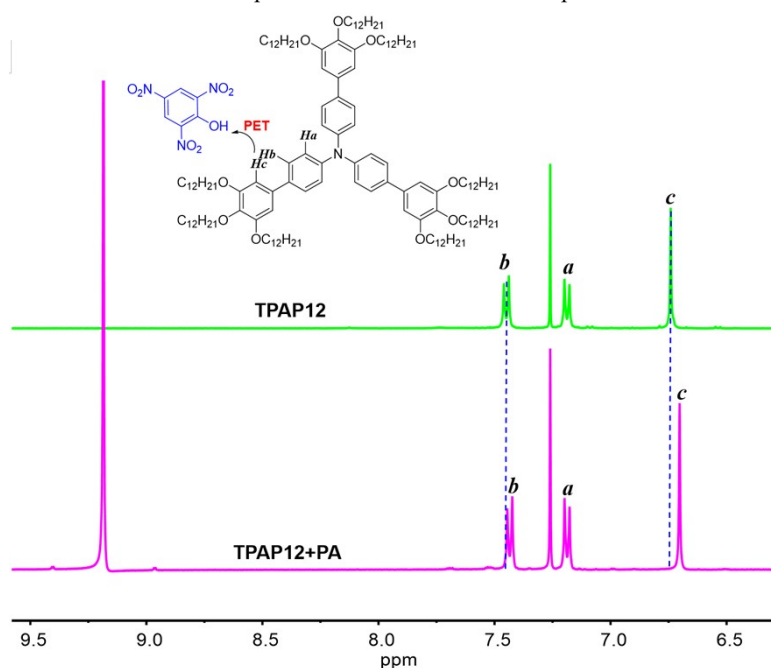

**Fig. S16**  $^1\text{H}$  NMR spectra of TPAP12 with addition of 10 equiv. PA in  $\text{CDCl}_3$ .

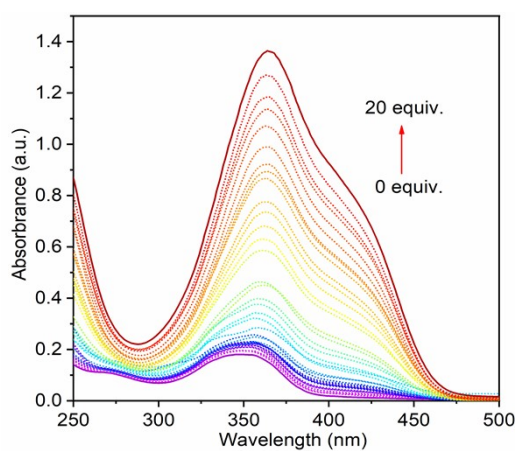

**Fig. S17** UV-Vis absorption spectra of TPAT12 ( $5.0 \times 10^{-6}$  M) upon addition of PA from 0 to 20 equiv. in a mixed aqueous solution ( $\text{H}_2\text{O} : \text{THF} = 1 : 1$ , v/v).



**Table S5** The comparison of probe **TPAT12** with some reported PA fluorescent probes.

| Entry | Structure                                                                           | LOD(M)                | $K_{sv}(M^{-1})$    | Time(s) | Solvent                         | Ref |
|-------|-------------------------------------------------------------------------------------|-----------------------|---------------------|---------|---------------------------------|-----|
| 1     | 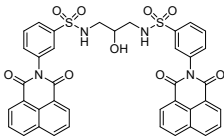   | $3 \times 10^{-9}$    | $2.20 \times 10^7$  | 12h     | PBS buffer (pH 7.4):DMSO (20:1) | S2  |
| 2     |    | $3.8 \times 10^{-9}$  | $1.63 \times 10^5$  | 180s    | H <sub>2</sub> O/THF (v/v, 8/2) | S3  |
| 3     |    | $4.7 \times 10^{-7}$  | $7.0 \times 10^4$   |         | (water/THF=9/1)                 | S4  |
| 4     |   | $1 \times 10^{-8}$    | $1.01 \times 10^6$  |         | pH 7.4 PBS–DMSO (99.5:0.5 v/v)) | S5  |
| 5     |  | $3 \times 10^{-9}$    | -                   | -       | HEPES buffer pH 7.2, 1% DMSO    | S6  |
| 6     |  | $2.82 \times 10^{-7}$ | $2.32 \times 10^6$  | -       | aqueous solution                | S7  |
| 7     |  | $1.2 \times 10^{-7}$  | -                   | -       | THF-H <sub>2</sub> O            | S8  |
| 8     |  | $2.15 \times 10^{-7}$ | $2.86 \times 10^4$  |         | DMF/H <sub>2</sub> O            | S9  |
| 9     |  | $3.8 \times 10^{-8}$  | $4.575 \times 10^4$ | -       | DMSO                            | S10 |



|    |                                                                                   |                       |                    |   |                          |           |
|----|-----------------------------------------------------------------------------------|-----------------------|--------------------|---|--------------------------|-----------|
| 10 | 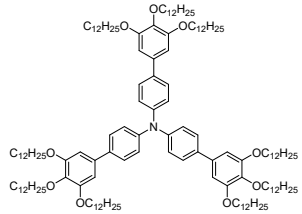 | $3.06 \times 10^{-9}$ | $1.69 \times 10^6$ | 5 | THF:H <sub>2</sub> O=1:1 | This work |
|----|-----------------------------------------------------------------------------------|-----------------------|--------------------|---|--------------------------|-----------|

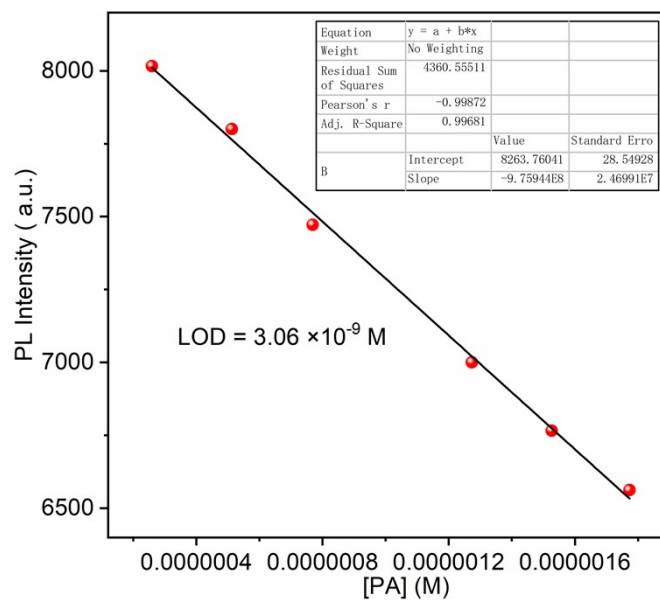

Fig. S18 Fitted plot of lower limit of detection of compound TPAT12 against PA.

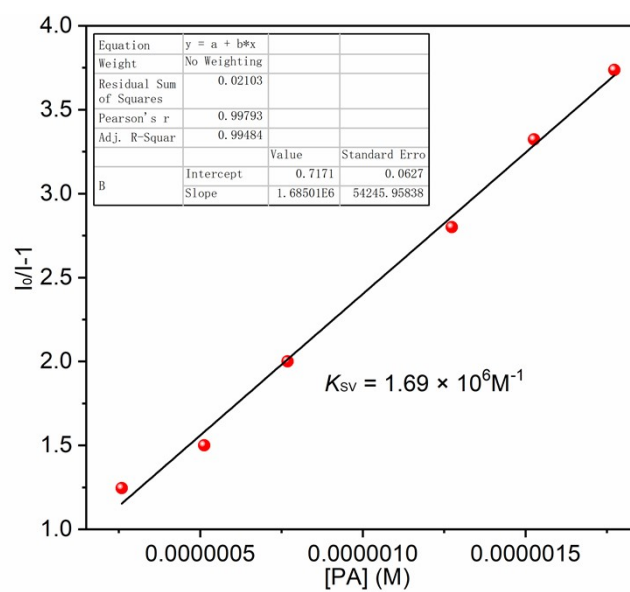

Fig. S19 Stern-Volmer plot of compound TPAT12 against PA.



**Table S6** Photovoltaic parameters of Si/PEDOT:PSS HSCs with different concentration of **TPAP12**.

| TPAP12 (vol %) | $J_{sc}$ [mA cm <sup>-2</sup> ] | $V_{oc}$ (V) | FF(%) | PCE(%) |
|----------------|---------------------------------|--------------|-------|--------|
| 0              | 32.89                           | 0.615        | 51.66 | 10.46  |
| 0.2            | 33.16                           | 0.632        | 57.38 | 12.03  |
| 0.4            | 32.76                           | 0.637        | 59.75 | 12.5   |
| 0.6            | 32.8                            | 0.638        | 59.35 | 12.42  |
| 0.8            | 32.12                           | 0.633        | 47.22 | 9.61   |

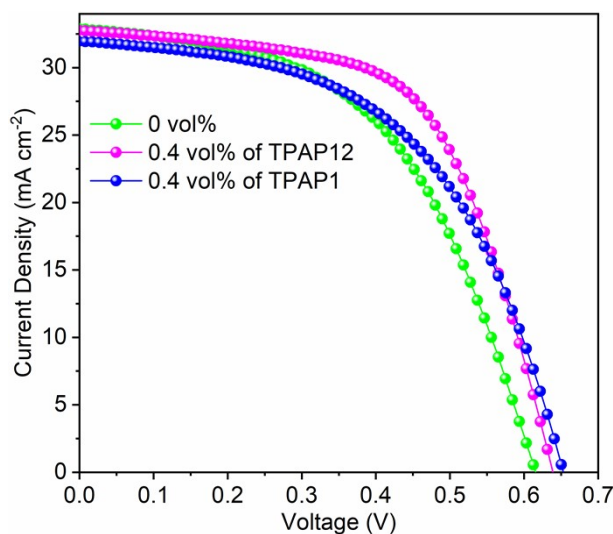**Fig. S20**  $J$ - $V$  characteristics of organic-Si solar cells with the same doping concentration of **TPAP12** and **TPAP1** under AM 1.5G illumination.**Table S7** Photovoltaic parameters of Si/PEDOT:PSS HSCs with the same doping concentration of **TPAP12** and **TPAP1**.

| Doping concentration      | $J_{sc}$ (mA/cm <sup>2</sup> ) | $V_{oc}$ (V) | FF (%) | PCE (%) |
|---------------------------|--------------------------------|--------------|--------|---------|
| 0 vol%                    | 32.89                          | 0.615        | 51.66  | 10.46   |
| 0.4 vol% of <b>TPAP12</b> | 32.76                          | 0.637        | 59.75  | 12.50   |
| 0.4 vol% of <b>TPAP1</b>  | 31.94                          | 0.653        | 52.69  | 10.99   |

## 5. References

- S1 Z. H. Li, Z. H. Wu, G. Mo, X. Q. Xing and P. Liu, *Instrum. Sci. Technol.*, 2014, **42**, 128–141.
- S2 A. Kumar and P. S. Chae, *Sensor Actuat. B*, 2007, **240**, 1–9.
- S3 H. M. Hao, C. Xu, H. Y. Luo, J. L. Yang, C. Liu, B. j. Xu, G. Shi, X. B. Xing and Z. G. Chi, *Mater. Chem. Front.*, 2021, **5**, 492–499.
- S4 H. W. Ma, C. Y. He, X. L. Li, O. Ablikim, S. Zhang and M. Zhang, *Sensor Actuat. B*, 2016, **230**, 746–752.
- S5 A. Kumar, A. Pandith and H. S. Kim, *Sensor Actuat. B*, 2016, **231**, 293–301.
- S6 S. Dhiman, G. Kumar, V. Luxami, P. Singh and S. Kumar, *New J. Chem.*, 2020, **44**, 10870–10877.
- S7 J. Harathi and K. Thenmozhi, *Chemosphere*, 2022, **286**, 131825.
- S8 H. Liu, Y. Y. Fu, W. Xu, Q. G. He, H. M. Cao, G. H. Liu and J. G. Cheng, *Sci. China Chem.*, 2018, **61**, 857–862.



S9 B. Wang, X. M. Ma, X. X. Zuo and J. Ma, *Phosphorus Sulfur Silicon Relat. Elem.*, 2021, **196**, 616–621.

S10 X. J. Li, Y. X. Hu, W. J. Huang, W. R. Li, G. Gao, C. W. Lü and Y. An, *J. Fluoresc.*, 2022, **32**, 1601–1610.
